# Supplementary material for: Understanding the impact of the Covid-19 pandemic on delivery of rehabilitation in specialist palliative care services: An analysis of the CovPall-Rehab survey data
Source: bioRxiv or medRxiv preprint supplement (doi:10.1101/2021.04.13.21255380), 2021-04-19
Supplement: Supplementary file [file media-1.pdf]

# COVPALL-Rehabilitation Collaboration Survey

Improving rehabilitation in palliative care services for people with and without COVID-19 by shared learning.

Thank you for considering completing this survey. We are trying to find out how rehabilitation teams within palliative care services are changing because of the COVID-19 pandemic. This is important as the disease is new and palliative care rehabilitation teams are changing how they work, so there is an opportunity to learn from each other.

We realise you are very busy right now and so we have tried to balance collecting information that patients, services and policy makers think is most helpful, while keeping the questionnaire as short as we can.

The questionnaire has 5 sections and should take no longer than 30 minutes to complete, although it may depend on how many additional/open comments you wish to share. We will consider everything you write. Although the grouped results will be shared, we will not name your rehabilitation team unless you ask us to.

You can pause the questionnaire by the clicking 'Save and Return Later' button at the bottom of the page. You will be given a code and sent a link to enable you to continue later. (If you forget the link, there should be a 'returning' option at the top right of this page.) If you wish to correct errors after you have clicked 'Submit', please email [palliativecare@kcl.ac.uk](mailto:palliativecare@kcl.ac.uk) with COVPALL-REHAB in the subject line.

If you have any concerns about this questionnaire or this study, please email [joanne.bayly@kcl.ac.uk](mailto:joanne.bayly@kcl.ac.uk). COV-PALL-REHAB is led by Professor Irene Higginson and Dr Matthew Maddocks of the Cicely Saunders Institute, with a multi-professional team of partners from different organisations and backgrounds. Patient representatives have contributed to this questionnaire and our plans. For more information see <https://www.kcl.ac.uk/cicelysaunders/research/evaluating/covpall-study>

This study has been granted ethical approval by the PNM Research Ethics Subcommittee of King's College London, code LRS-19/20-18541.

For the purposes of this questionnaire, rehabilitation includes all the usual assessments and interventions provided by Allied Health Professionals and associated colleagues, including dietitians, occupational therapists, physiotherapists, speech and language therapists and therapy assistants. Interventions provided by other disciplines can be included if they are explicitly provided within a rehabilitation service.

## 1. ABOUT YOU AND YOUR SERVICE

1.1 Contact email of the person completing the survey

\_\_\_\_\_  
(We need this information so we can help you get back into the survey, or help you to complete it, if you have difficulty)

1.2 Name of the person completing the survey

\_\_\_\_\_

1.3 Date

\_\_\_\_\_  
(DD-MM-YYYY)

---

1.4 Country

- England
  - Scotland
  - Wales
  - N Ireland
  - Australia
  - Belgium
  - Canada
  - Germany
  - Ireland
  - Italy
  - Poland
  - New Zealand
  - Other (a box will open)
- (A regions option may appear)
- 

1.4a Country (please specify)

---

1.4b English Regions

- North East
  - North West
  - Yorkshire and The Humber
  - East Midlands
  - West Midlands
  - East
  - London
  - South East
  - South West
- 

1.4c Welsh region

- N Wales
  - W Wales
  - SE Wales
  - Mid Wales
- 

1.4d Scottish region

- Fife, Lothian, Borders, Dumfries & Galloway
  - Greater Glasgow & Clyde, Ayrshire & Arran, Lanarkshire, Forth Valley
  - Tayside, Grampian, Western Isles, Highland, Orkney and Shetland
- 

1.4e Region

---

1.5 Please specify your therapy manager role

---

1.6 Professional Discipline

- Physiotherapist / Physical Therapist
  - Occupational Therapist
  - Dietitian
  - Speech and Language Therapist / Speech Pathologist
  - Nurse
  - Social Worker
  - Physician/medical doctor
  - Non-clinical manager
  - Other (a box will open)
- 

Other Professional Discipline

---

---

Next Page takes you to the main questions. You must complete the information above first, but you can return here later if you wish to change anything  
You must click "Next Page" or "Save and Return Later" to save any data you have entered

**MAIN SURVEY****2. ABOUT THE REHABILITATION USUALLY OFFERED BY YOUR SERVICE BEFORE THE COVID-19 PANDEMIC**

2.1 Which type of organisation is your rehabilitation service based in

- Community /primary care  
 Hospital  
 Hospice organisation  
 Other (a box will open)  
 (Please tick all that apply)

Other Sector

---

2.2 Approximate number of new patients seen annually

\_\_\_\_\_

(Must be a number)

2.3 Types of patients cared for

- Adults  
 Children (< 18 years)  
 Adults and children

2.4 In what settings did your service provide rehabilitation for people under the care of a palliative care team

- Patient's home  
 Nursing home  
 Residential care home  
 Community hospital  
 Primary care centre  
 Non-health community centre  
 Hospital in-patients  
 Hospital out-patients  
 Hospice in-patients  
 Hospice out-patients  
 Hospice day-therapy  
 Virtual (i.e. telephone, video-link)  
 Other (a box will open)  
  
 (Please tick all that apply)

Other Settings

---

2.5 Please indicate if your service provides rehabilitation for people with the following health conditions

- Any advanced health condition  
 Respiratory conditions  
 Cancer  
 Cardio-vascular conditions  
 Neurological conditions  
 Renal / Liver disease  
 Dementia  
 Other (a box will open)  
 (Please tick all that apply)

Other Health Conditions

---

Additional information about usual rehabilitation services offered before the COVID Pandemic

2.6 Rehabilitation team members (a box will open for full time equivalents)

---

2.6a Number of Physiotherapists

\_\_\_\_\_  
(A box will open for FTE)

---

Full time equivalent Physiotherapists

\_\_\_\_\_

---

2.6b Number of Occupational Therapists

\_\_\_\_\_  
(A box will open for FTE)

---

Full time equivalent Occupational Therapists

\_\_\_\_\_

---

2.6c Number of Dietitians

\_\_\_\_\_  
(A box will open for FTE)

---

Full time equivalent Dietitians

\_\_\_\_\_

---

2.6d Number of Speech and Language Therapists

\_\_\_\_\_  
(A box will open for FTE)

---

Full time equivalent Speech and Language Therapists

\_\_\_\_\_

---

2.6e Number of Therapy Assistants

\_\_\_\_\_  
(A box will open for FTE)

---

Full time equivalent Therapy Assistants

\_\_\_\_\_

---

2.6f Other (please specify with numbers)

\_\_\_\_\_  
(A box will open for FTE)

---

Full time equivalents for above

\_\_\_\_\_

---

2.7 If volunteers are usually involved in the delivery of your service, please provide details

\_\_\_\_\_

---

2.8 Is there anything else you want to tell us about how your service usually operates that you think it is important for us to know

\_\_\_\_\_

---

### 3. REHABILITATION PROVISION DURING THE PANDEMIC

Rehabilitation provided for patients who are NOT DIAGNOSED OR WITHOUT SUSPECTED COVID-19 during the pandemic

3.1 Has COVID-19 changed how you provide rehabilitation for the types of patients you would usually support

Yes  No  
(The following questions may change)

Please give details of any changes to specific rehabilitation assessments and interventions during the pandemic that would usually be provided by your service for people not suspected of having COVID19

3.1a Physiotherapy changes

\_\_\_\_\_

3.1b Occupational Therapy changes

\_\_\_\_\_

3.1c Dietetics changes

\_\_\_\_\_

3.1d Speech and Language Therapy changes

\_\_\_\_\_

3.1e Therapy assistants (please specify where linked with a specific discipline)

\_\_\_\_\_

3.1f Other team members (please specify)

\_\_\_\_\_

3.2 What is the shortest time in days that patients are under the care of your rehabilitation service during the COVID-19 pandemic

\_\_\_\_\_

3.3 What is the longest time in days that patients are under the care of your rehabilitation service during the COVID-19 pandemic

\_\_\_\_\_

Does this time include people you are still caring for

Yes  No

Rehabilitation provided for patients who have SUSPECTED, CONFIRMED or RECOVERING from COVID-19 during the pandemic

3.4 Has the rehabilitation service developed any new risk assessment procedures to guide how the service is provided safely for people with suspected, confirmed or recovering from COVID-19

Yes  No  
(A box will open for details)

Please give details of these risk assessment procedures

\_\_\_\_\_

3.5 Has your service provided rehabilitation for people with suspected, confirmed or recovering from COVID-19

Yes  No  
(The following questions may change)

3.5a Of the patients on your caseload with suspected, confirmed or recovering from COVID-19, would you say that they were

(Tick all that apply)

- Patients who are severely ill or dying due mainly to COVID-19
- Patients with pre-existing illness / co-morbidities as well as COVID-19 who are severely ill or dying
- Patients who are recovering following suspected or confirmed COVID-19
- Other (a box will open)

Please specify the other types of patients

---

3.6 Which settings were rehabilitation procedures provided in for people with suspected, confirmed or recovering from COVID-19

- Patient's home
- Nursing home
- Residential care home
- Community hospital
- Primary care centre
- Non-health community centre
- Hospital in-patients
- Hospital out-patients
- Hospice in-patients
- Hospice out-patients
- Hospice day-therapy
- Virtual (i.e. telephone, video-link)
- Other (a box will open)
- (Tick all that apply)

Please specify the other settings

---

3.7 Please give details of the rehabilitation interventions provided by your service for people with suspected, confirmed or recovering from COVID-19

Physiotherapy

---

Occupational Therapy

---

Dietetics

---

Speech and Language Therapy

---

Therapy assistants (please specify where linked with a specific discipline)

---

Other team members (please specify)

---

3.8 Did you have protocols or guidance for the provision of rehabilitation for people with confirmed or suspected COVID-19

Yes  No

3.9 What sources of information did you use

- Locally developed guidance  
 National Professional Bodies  
 NHS  
 NICE  
 Other (a box will open)

Please specify the other sources of information

\_\_\_\_\_

3.10 Have you or any of your rehabilitation team had suspected or confirmed COVID-19

- Yes    No  
 (Boxes will open for details)

Approximately how many staff

\_\_\_\_\_

What impact has this had on your service

\_\_\_\_\_

#### 4. REHABILITATION TEAM REFERRALS AND CASELOAD DURING THE COVID-19 PANDEMIC

4.1 Have your referral procedures or referral criteria changed during the COVID-19 pandemic

- Yes    No

Please give details

\_\_\_\_\_

4.2 Has there been any change in the number of referrals to your service during the COVID-19 pandemic

- A lot more  
 Slightly more  
 About the same  
 A little less  
 A lot less

Please give details on changes to the number of referrals

\_\_\_\_\_

4.3 Has there been any change in the number of patients being seen by your service (your caseload) during the COVID-19 pandemic

- A lot more  
 Slightly more  
 About the same  
 A little less  
 A lot less

Please give details on changes to the number of referrals

\_\_\_\_\_

4.4 Would you say your face to face contact with patients is in general

- A lot more  
 Slightly more  
 About the same  
 A little less  
 A lot less

4.5 Would you say your telephone / remote connection contact with patients is in general

- A lot more  
 Slightly more  
 About the same  
 A little less  
 A lot less



---

4.6 Would you say your face to face contact with family members is in general

- A lot more  
 Slightly more  
 About the same  
 A little less  
 A lot less

---

4.7 Would you say your telephone / remote connection contact with family members is in general

- A lot more  
 Slightly more  
 About the same  
 A little less  
 A lot less

---

4.8 Would you say your contact with other members of the multi-disciplinary team is

- A lot more  
 Slightly more  
 About the same  
 A little less  
 A lot less

---

4.9 Would you say your telephone/remote connection advice and support for other clinicians is

- A lot more  
 Slightly more  
 About the same  
 A little less  
 A lot less

---

4.10 Have you furloughed any of your AHP team

- Yes  No  
(A box will open for details)

---

Please give details

---

---

4.11 Have you lost staff from your service who have been redeployed to other services in your organisation or other organisations

- Yes  No  
(A box will open for details)

---

Please give details (lost staff)

---

---

4.12 Have rehabilitation staff offered to help your service from elsewhere

- Yes  No  
(A box will open for details)

---

Please give details

---

---

4.13 Have you changed how your rehabilitation service is organized (e.g. supporting patients with and without COVID-19)

- Yes  No  
(A box will open for details)

---

Please give details

---

---

4.14 Have you changed where and how your staff work (including hours and location)

- Yes  No  
(A box will open for details)

---

Please give details

---

4.15 Have you changed where and how your volunteers work (including hours and location)

Yes  No  
(A box will open for details)

Please give details

\_\_\_\_\_

4.16 Have there been any changes to the patient facing information or instructional resources (online and paper) your team members are using during the COVID-19 Pandemic (including new resources and resources no longer used)

\_\_\_\_\_

4.17 Please give details of any patient facing resources you feel are lacking

\_\_\_\_\_

4.18 Please give detail of any other changes in the working practices of your team that are not covered in the questions above

\_\_\_\_\_

Use of virtual technologies

4.19 Are you are using virtual technologies (e.g. zoom, skype, teams) with patients and families to provide rehabilitation interventions

Yes, always used virtual technologies  
 Yes, new service provision since start of COVID-19 pandemic  
 No

What have been the difficulties with virtual technologies

\_\_\_\_\_

What has worked well with virtual technologies

\_\_\_\_\_

4.20 Please give details of any virtual technology equipment provided for therapy team members to enable you to provide services and who provided it

\_\_\_\_\_

4.21 Please give details of any virtual technology equipment provided for patients to enable rehabilitation services and who provided it

\_\_\_\_\_

4.22 If no virtual technologies are being used to support the provision of rehabilitation services provided by your team members, or to support communication with patient and the wider MDT, please specify why

No access to technologies  
 No training in use of technologies  
 Rehabilitation interventions provided by this service, cannot be provided virtually  
 Other (please explain below)  
(Check all that apply)

Please give additional details

\_\_\_\_\_  
(Use this space for comments on any part of 4.22)

## 5. CHALLENGES AND INNOVATION IN RESPONSE TO COVID-19

We want to know more about the challenges you have faced, their impacts on your service and care and how you have responded to them, including what you have found to be successful innovations

---

5.1 Have you had problems accessing personal protective equipment

Yes  No  
(Additional questions will open)

---

Please specify what you have had a shortage of

---

---

What did you do about it

---

---

Has this been a problem in the last 7 days

Yes  Sometimes  
 No

---

5.2 Please give details if any patients are finding it more difficult to access services because of changes made to provision during the COVID-19 Pandemic

---

---

5.3 Please give details if any patients are finding it easier to access services because of changes made to provision during the COVID-19 Pandemic

---

---

5.4 Have you had any difficulties providing rehabilitation equipment / assistive devices

Yes  Sometimes  
 No  
(The following questions may change)

---

Please give details about these difficulties

---

---

What did you do about problems accessing equipment / assistive devices

---

---

Have you had problems accessing equipment/assistive devices in the last 7 days

Yes  
 Sometimes  
 No

---

5.6 Have there been other effects on yourself and/or members of your rehabilitation team that you think we should know about

---

---

5.7 Please tell us about any challenges and how you overcame them

---

---

5.8 What do you foresee will be the biggest challenges for COVID-19 in your rehabilitation service over the next months

---

---

5.9 What would help you to overcome these

---

---

6. Now please tell us about any innovations within your rehabilitation service (that are not already described above). We are keen to learn what has worked best for you

---

6.1 Please tell us about any change in practice or innovation that you think has been most successful to your working and the provision of rehabilitation by your team

---

6.2 Why is this

---

6.3 What would you say were the most important things that made this possible

---

6.4 Please list any other important innovations / changes you have made

---

6.5 What innovations do you plan to keep, to integrate into your usual service provision (including anything described in sections above)

---

## 7. FINALLY

---

Please indicate if you would like / are willing to be contacted regarding any of the following (Tick all that apply)

- To receive copy of the early reports and our newsletters as the findings emerge
  - For us to check any information with you
  - To be acknowledged as responding to this questionnaire (listed along with other services) in the reports and any publications
  - To participate in any subsequent surveys like this one in the future when you may have made more changes or had more experiences
- 

If you wish us to use a different Name and Email for the above (instead of the ones already given) please specify here

---

Please specify how you would like your service to be named and acknowledged in reports if applicable

---

You will be free to opt out of receiving updates at any time, your details will not be passed onto other organisations or used for anything other than with your explicit consent above. Your individual responses will remain confidential, they will be analysed pseudo anonymously by the research team, with your service identified only by a code number unless you explicitly ask us to do otherwise.

---

Thank you for your help at this difficult time

PLEASE NOW CLICK SUBMIT

You must click "Submit" or "Save and Return Later" to save any data you have entered
